# Supplementary material
Source: publisher site journal article supplement (https://www.dovepress.com/article/358847)
Supplement: Supplementary file 1 [file get_supplementary_file.php]

**SUPPLEMENTARY MATERIALS**

**Supplemental Table 1. Characteristics Captured 12 Months Before Fuchs Diagnosis**

| **Characteristic** | **Statistic or Category** | **Endothelial keratoplasty** | **No keratoplasty** | ***P* value** |
| --- | --- | --- | --- | --- |
| **(N = 1562)** | **(N = 23485)** |
| **Age (continuous, years)** | Mean (SD) | 66.86 (11.71) | 64.44 (14.18) | <0.001* |
| **Age at diagnosis (years), N (%)** | 18-44 | 27 (1.73%) | 1,733 (7.38%) | <0.001* |
| 45-64 | 742 (47.50%) | 10,682 (45.48%) |  |
| 65+ | 793 (50.77%) | 11,070 (47.14%) |  |
| **Gender of Patient, N (%)** | Male | 669 (42.83%) | 8,007 (34.09%) | <0.001* |
| Female | 893 (57.17%) | 15,478 (65.91%) |  |
| **Region, N (%)** | Northeast | 333 (21.32%) | 8,375 (35.66%) | <0.001* |
| North Central | 447 (28.62%) | 5,407 (23.02%) |  |
| South | 617 (39.50%) | 8,020 (34.15%) |  |
| West | 161 (10.31%) | 1,636 (6.97%) |  |
| Unknown | 4 (0.26%) | 47 (0.20%) |  |
| **Diagnosis year, N (%)** | 2014 | 621 (39.76%) | 7,291 (31.05%) | <0.001* |
| 2015 | 506 (32.39%) | 7,663 (32.63%) |  |
| 2016 | 272 (17.41%) | 5,468 (23.28%) |  |
| 2017 | 163 (10.44%) | 3,063 (13.04%) |  |
| **Time to first treatment since Fuchs diagnosis (months)** | Mean (SD) | 13.75 (14.35) | N/A |  |
| **Charlson Comorbidity Index 12 months pre-diagnosis, N (%)** | 1 | 305 (47.73%) | 4,559 (48.27%) | 0.923 |
| 2 | 160 (25.04%) | 2,299 (24.34%) |  |
| 3+ | 174 (27.23%) | 2,587 (27.39%) |  |
| **Ocular severity score¥** | Mean (SD) | 0.15 (0.50) | 0.12 (0.44) | 0.011* |
| **Glaucoma, N (%)** | Y | 294 (18.82%) | 3,796 (16.16%) | 0.006* |
| **Cataract, N (%)** | Y | 336 (21.51%) | 4,756 (20.25%) | 0.231 |
| **COSTS 12 MONTHS PRE-DIAGNOSIS** |  |  |  |  |
| **All-cause total cost** | Mean (SD) | 14282.76 (48854.39) | 14503.64 (35982.74) | 0.547 |
| **All-cause inpatient medical cost** | Mean (SD) | 2491.34 (12925.48) | 3116.04 (19255.04) | 0.621 |
| **All-cause outpatient medical cost** | Mean (SD) | 8640.09 (44745.05) | 8286.05 (24614.40) | 0.316 |
| **All-cause prescription drug cost** | Mean (SD) | 3151.33 (7156.59) | 3101.55 (9078.04) | <0.001* |
| **Eye diseases related medical cost** | Mean (SD) | 1283.16 (5150.42) | 839.21 (4654.37) | <0.001* |
| **Eye diseases prescription drug cost (IOP lowering, ophthalmic steroids, topical NSAIDs, steroids, antibiotics, lubricants) pre-index 12 months)** | Mean (SD) | 234.24 (754.15) | 134.11 (494.33) | <0.001* |
| N/A: Not applicable  **¥**Ocular severity score was measured a count of ocular conditions including retinal vein occlusion, macular edema, retinopathy, and retinal detachment.  *Indicates statistically significant at the 0.05 level | | | | |
